RESEARCH ARTICLE

# Red-Shifted Aequorin Variants Incorporating Non-Canonical Amino Acids: Applications in *In Vivo* Imaging

Kristen M. Grinstead<sup>1</sup>, Laura Rowe<sup>2</sup>, Charles M. Ensor<sup>3</sup>, Smita Joel<sup>1</sup>, Pirouz Daftarian<sup>1</sup>, Emre Dikici<sup>1</sup>, Jean-Marc Zingg<sup>1</sup>, Sylvia Daunert<sup>1\*</sup>

**1** Department of Biochemistry and Molecular Biology, R. Bunn Gautier Bldg., 1011 NW 15th Street, Miller School of Medicine, University of Miami, Miami, FL, 33136, United States of America, **2** Department of Chemistry, 1610 Campus Drive East, Valparaiso University, Valparaiso, IN, 46385, United States of America, **3** Department of Pharmaceutical Sciences, College of Pharmacy, University of Kentucky, Lexington, KY, 40536, United States of America

\* [SDaunert@med.miami.edu](mailto:SDaunert@med.miami.edu)

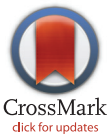

**OPEN ACCESS**

**Citation:** Grinstead KM, Rowe L, Ensor CM, Joel S, Daftarian P, Dikici E, et al. (2016) Red-Shifted Aequorin Variants Incorporating Non-Canonical Amino Acids: Applications in *In Vivo* Imaging. PLoS ONE 11(7): e0158579. doi:10.1371/journal.pone.0158579

**Editor:** D. Dafydd Jones, Cardiff University, UNITED KINGDOM

**Received:** November 6, 2015

**Accepted:** June 17, 2016

**Published:** July 1, 2016

**Copyright:** © 2016 Grinstead et al. This is an open access article distributed under the terms of the [Creative Commons Attribution License](https://creativecommons.org/licenses/by/4.0/), which permits unrestricted use, distribution, and reproduction in any medium, provided the original author and source are credited.

**Data Availability Statement:** All relevant data are within the paper and its Supporting Information files.

**Funding:** This study was funded by the National Institutes of Health, grant number 7R01GM047915, and by the Lucille P. Markey Chair. The funders had no role in study design, data collection and analysis, decision to publish, or preparation of the manuscript.

**Competing Interests:** The authors have declared that no competing interests exist.

## Abstract

The increased importance of *in vivo* diagnostics has posed new demands for imaging technologies. In that regard, there is a need for imaging molecules capable of expanding the applications of current state-of-the-art imaging *in vivo* diagnostics. To that end, there is a desire for new reporter molecules capable of providing strong signals, are non-toxic, and can be tailored to diagnose or monitor the progression of a number of diseases. Aequorin is a non-toxic photoprotein that can be used as a sensitive marker for bioluminescence *in vivo* imaging. The sensitivity of aequorin is due to the fact that bioluminescence is a rare phenomenon in nature and, therefore, it does not suffer from autofluorescence, which contributes to background emission. Emission of bioluminescence in the blue-region of the spectrum by aequorin only occurs when calcium, and its luciferin coelenterazine, are bound to the protein and trigger a biochemical reaction that results in light generation. It is this reaction that endows aequorin with unique characteristics, making it ideally suited for a number of applications in bioanalysis and imaging. Herein we report the site-specific incorporation of non-canonical or non-natural amino acids and several coelenterazine analogues, resulting in a catalog of 72 cysteine-free, aequorin variants which expand the potential applications of these photoproteins by providing several red-shifted mutants better suited to use *in vivo*. *In vivo* studies in mouse models using the transparent tissue of the eye confirmed the activity of the aequorin variants incorporating L-4-iodophenylalanine and L-4-methoxyphenylalanine after injection into the eye and topical addition of coelenterazine. The signal also remained localized within the eye. This is the first time that aequorin variants incorporating non-canonical amino acids have shown to be active *in vivo* and useful as reporters in bioluminescence imaging.

## Introduction

Imaging is a critical component of medical diagnostics and biomedical research. X-Ray computed tomography, ultrasonography, magnetic resonance imaging (MRI), and positron emission tomography imaging (PET), and optical methods based on fluorescence or bioluminescence are used as stand-alone or in-tandem in diagnostic imaging to provide information on morphological, anatomical, or organ function. Despite their wide use, the majority of these methods do not have the ability to monitor specific molecular events linked to disease states and provide a complete picture of a biochemical process. *In vivo* imaging systems (IVIS) [1–4] is currently the state-of-the-art instrumentation used in molecular imaging to investigate biological processes in whole animal bioluminescence imaging (BLI) employing reporter technologies. IVIS has a fast image acquisition time (from seconds to a few minutes) and can be used to image several animals at once, providing a high throughput cost-effective alternative.

“Living light” or bioluminescence, is a naturally occurring phenomenon where light is generated by living organisms. Bioluminescence has several advantages over fluorescence, most notably the high sensitivity shown by the subattomole detection limits *in vitro*, and low background caused by the lack of inherent bioluminescence in most tissues [5–8]. Furthermore, bioluminescence does not require external illumination, making it suitable for light sensitive organs and tissues such as the retina.

Bioluminescent studies have frequently been conducted using the intracellular expression of proteins such as firefly luciferase (FLuc) and *Renilla* luciferase (RLuc) [9–21]. Though these proteins have the benefits of bioluminescence and have been used for *in vivo* cell tracking and gene expression, they require the incorporation of foreign DNA or the transplant of transgenic tissue [22, 23]. To overcome these drawbacks, we propose the direct administration of engineered red-shifted emission variants of the photoprotein aequorin, a protein employed previously in deep tissue calcium measurements [24].

Aequorin is a 22 kDa non-toxic photoprotein originally isolated from the bioluminescent jellyfish *Aequorea victoria* and employed initially for *in vivo* calcium detection [25, 26]. In addition, aequorin has found numerous applications in cell trafficking [27, 28], biosensing [29–32], and in bioluminescent competitive [30] and immunoassays [33–41]. Aequorin uses the conversion of the incorporated luciferin coelenterazine to coelenteramide to emit a flash of light at 472 nm. The coelenterazine is bracketed in the hydrophobic pocket by H-bonds with three triads: Tyr184-His169-Trp173, Tyr192-His58-Trp108, and Tyr82-His16-Trp86 [42–44] (Fig 1). The addition of calcium causes a change in the conformation of the protein, triggering the bioluminescence reaction. The availability of different synthetic coelenterazine analogs with a variety of emission maxima and half-lives, allows for the tuning of emitted light [45, 46]. Since wild-type aequorin emits in the blue region of the visible spectrum, and since the emitted light at that particular wavelength is more easily absorbed and scattered by tissue, the availability of red-shifted aequorin mutants is important for further expanding its role *in vivo*.

In addition to synthetic coelenterazine, random and site-directed mutations have been used by us and others to create a variety of aequorin analogs with different wavelengths of emission and half-lives [8, 46, 48–54]. Although aequorin variants with unique spectral characteristics using canonical amino acids have been created, the range of emission properties can be further tailored by strategic incorporation of non-natural amino acids [46, 53].

Previous studies have shown that mutations in the protein sequence involving the Tyr82-His16-Trp86 triads using canonical amino acids have a great effect on the spectral characteristics of aequorin while maintaining its bioluminescent activity, most notably a red-shift in the emission wavelength. This led to the selection of the tyrosine at position 82 and tryptophan at position 86 for replacement in a cysteine-free aequorin variant (hereafter “aequorin”), to

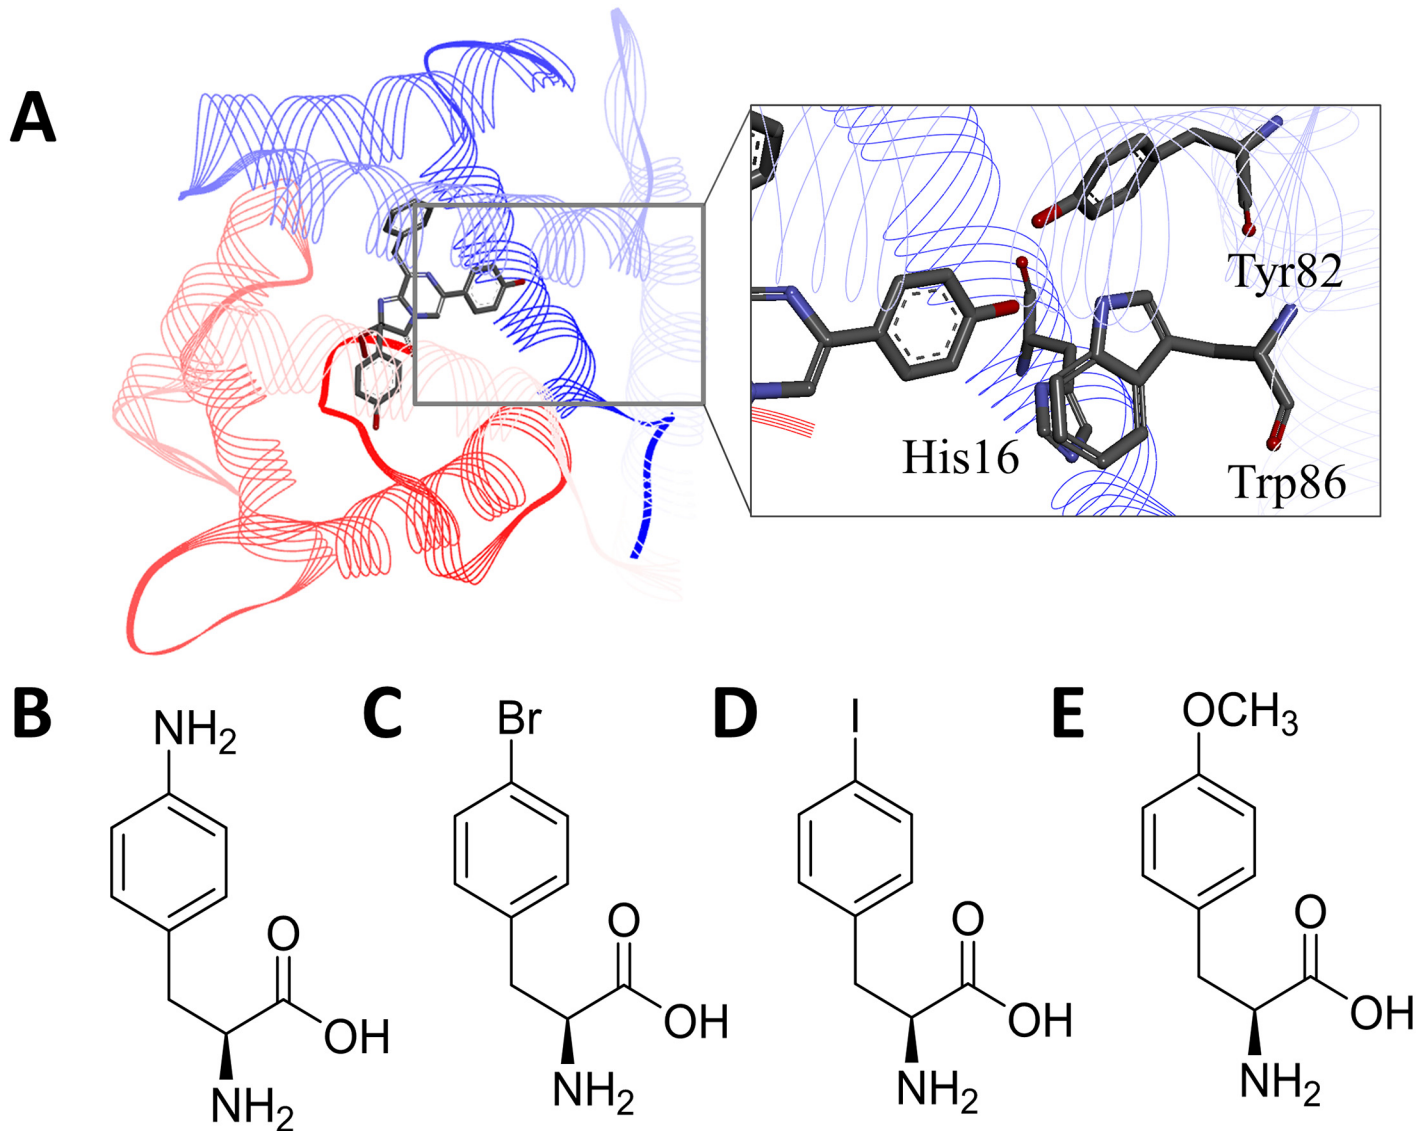

**Fig 1. Structures of wild-type aequorin and the non-natural amino acid analogs employed for site-selective incorporation into the protein.** (A) Crystal structure of aequorin with the location of the Tyr82-His16-Trp86. The substituted tyrosine is at position 82 and the substituted tryptophan is at position 86. (B) Chemical structure of non-natural amino acids: L-4-aminophenylalanine, (C) L-4-bromophenylalanine, (D) L-4-iodophenylalanine, (E) L-4-methoxyphenylalanine (PDB ID: 1EJ3). Reprinted from [47] under a CC BY license, with permission from *Open Access Dissertations*, original copyright 2015.

doi:10.1371/journal.pone.0158579.g001

minimize the absorption of the signal by tissue during *in vivo* studies, such as in calcium imaging and in the previously mentioned deep tissue studies [41, 55]. In this study, the tryptophan residue at position 86 was replaced with four different non-natural amino acids L-4-aminophenylalanine (AminoPhe), L-4-bromophenylalanine (BromoPhe), L-4-iodophenylalanine (IodoPhe), and L-4-methoxyphenylalanine (MethoxyPhe). The position was also substituted simultaneously with the tyrosine at position 82. The variants were then complexed with native coelenterazine and eight synthetic coelenterazines *cp*, *f*, *fcp*, *h*, *hcp*, *i*, *ip*, and *n* (Fig 2).

To test the applicability of these red-shifted aequorin variants for *in vivo* imaging the variant with the greatest red-shifted wavelength and the variant with the longest half-life were each injected intrasomally into the eye of a 6–8 week old ICR (CD1) outbred female mouse. The

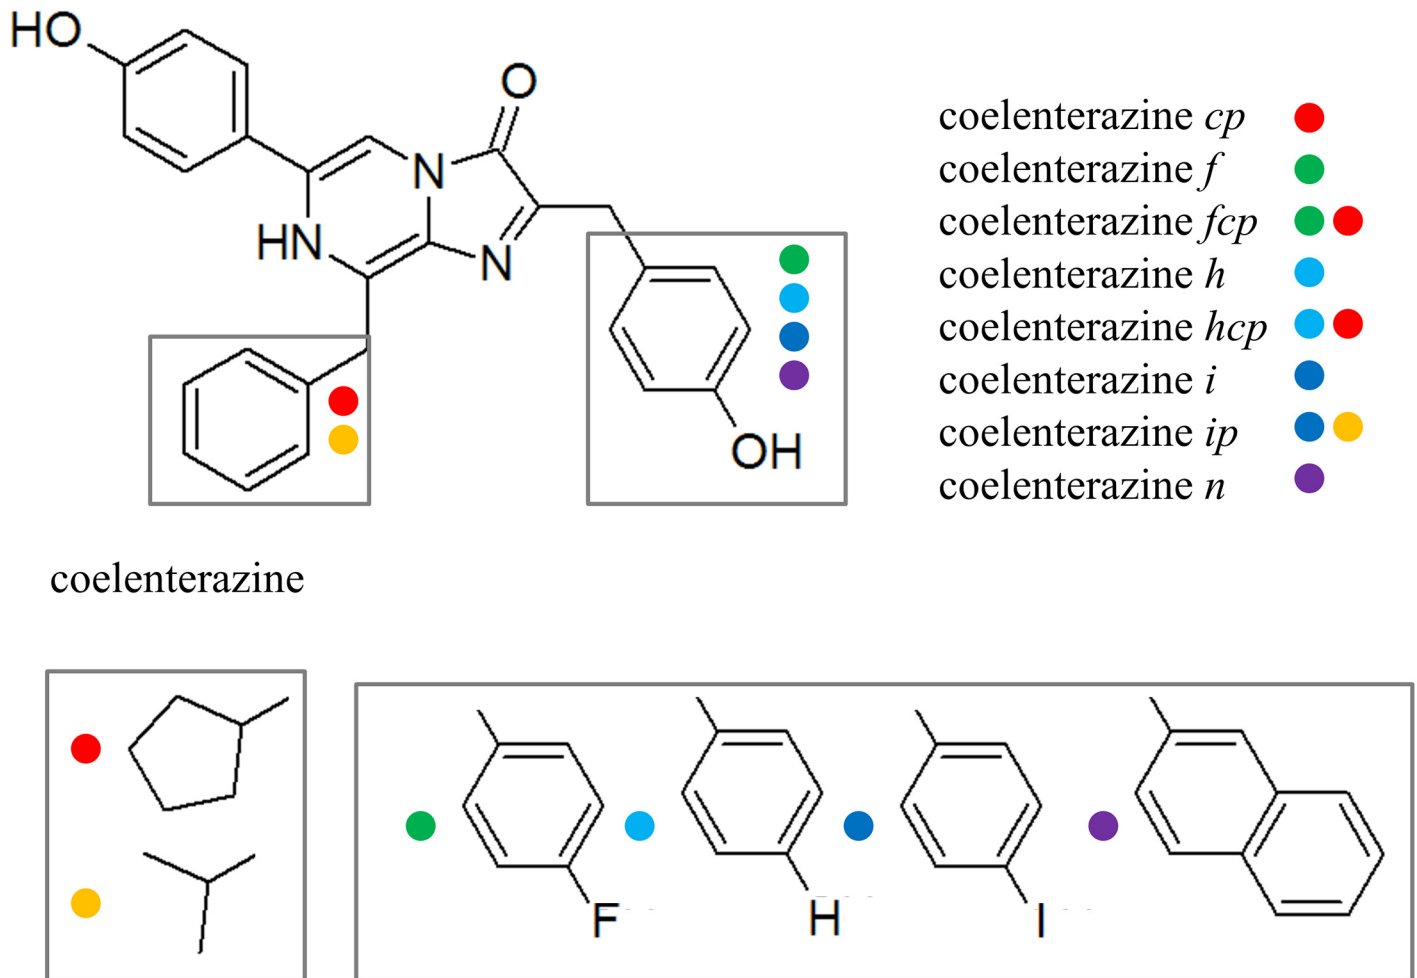

**Fig 2. Structures of synthetic coelenterazines.** Reprinted from [47] under a CC BY license, with permission from *Open Access Dissertations*, original copyright 2015.

doi:10.1371/journal.pone.0158579.g002

bioluminescence was then triggered by topical addition of coelenterazine and the emission of light detected with a IVIS instrument. Though aequorin has been part of imaging tissues as difficult to access as the deep brain, [56], the eye was chosen for our initial visualization studies because of its characteristics of optical transparency, simple anatomy, well-defined structure, and easy accessibility.

## Results and Discussion

To circumvent the limitations of current luminescent proteins in imaging and expand their use *in vivo*, we have prepared a catalog of mutants of the tunable photoprotein aequorin [8, 26, 46, 57]. We prepared these variants by site-specifically incorporating non-natural amino acids into selected sites of the hydrophobic pocket of aequorin using Amber Suppression [42, 55, 58, 59]. Previous work in our group employing Amber Suppression replaced a tyrosine residue at position 82 by introducing a TAG codon to create functional non-natural variants of aequorin with red-shifted wavelengths of emission and longer bioluminescence half-lives [46]. In the present study, our group individually incorporated four different non-natural amino acids, specifically, L-4-aminophenylalanine (AminoPhe), L-4-bromophenylalanine (BromoPhe), L-4-iodophenylalanine

(IodoPhe), and L-4-methoxyphenylalanine (MethoxyPhe), into aequorin at position 86 alone and 82 and 86 together (Fig 1). These non-natural amino acid residues were selected for their hydrophobicity, aromaticity, and their size similarity to tyrosine and tryptophan [42–44]. By complexing them with native coelenterazine and eight synthetic coelenterazine analogs, this work resulted in 72 new bioluminescent aequorin variants; several of these variants had red-shifted wavelengths of emission, and both shorter and longer bioluminescence half-lives were observed as compared to those of native aequorin.

Two plasmid systems were developed to express the aequorin variants. The first system incorporated the non-natural amino acids into position 86 using a pBAD/HisA vector by using well-established molecular biology protocols [60] that was co-transformed with pDULE vectors engineered for each non-natural amino acid procured from the Schultz group [61]. This resulted in a system in which the expression of aequorin is tightly regulated by the *araBAD* promoter and protein expression is induced by the addition of arabinose to the culture medium. The culture was then spun down and aequorin isolated from the supernatant by acid precipitation. Low-level expression of the L-4-aminophenylalanine aequorin prompted the generation of a second system in which the aequorin gene with a TAG codon at position 86 was inserted into a pET30Xa/LIC plasmid. This construct produced a good yield of the 86 variant aequorin and was used in all subsequent experiments (S1 Fig). The pETXa/LIC also included a His6x tag to aid in purification.

The protein variants were prepared by supplementing the culture media containing the appropriate plasmids with the selected non-natural amino acid and expression was induced with IPTG. The cells were lysed, and the protein variants were isolated and purified using affinity chromatography. Incorporation of the non-natural amino acids was verified by mass spectrometry (S1 Table, S7–S11 Tables) and the resulting variants were complexed with one of nine different coelenterazine analogs: *native*, *cp*, *f*, *fc*, *h*, *hcp*, *i*, *ip*, or *n*. The resulting aequorin variants were characterized for specific activity, wavelength emission maximum, and bioluminescence emission half-life (S2–S4 Tables). Though not all mutants displayed a marked red-shift and also displayed the loss in specific activity associated with synthetic coelenterazine analogs, several mutant aequorin and synthetic coelenterazine complexes showed suitable emission characteristics.

The data in Table 1 shows the change in the wavelength maximum emission spectra and bioluminescence emission half-lives for selected variants as well as wild-type aequorin. The aequorin variants with single substitutions at position 86 showed longer bioluminescence emission half-lives than those found in our previous study with an aequorin containing a single

**Table 1. Emission characteristics of selected aequorin variants.**

| Aequorin and CTZ                     | Wavelength (nm) | Half-life (s) |
|--------------------------------------|-----------------|---------------|
| Wild-type Aequorin and <i>Native</i> | 472             | 0.5           |
| IodoPhe 86 <i>Native</i>             | 499             | 14.3          |
| IodoPhe 86 <i>i</i>                  | 508             | 38.01         |
| AminoPhe 82&86 <i>Native</i>         | 496             | 3.57          |
| AminoPhe 82&86 <i>i</i>              | 515             | 58.68         |
| BromoPhe 82&86 <i>Native</i>         | 500             | 3.21          |
| BromoPhe 82&86 <i>i</i>              | 514             | 55.62         |
| IodoPhe 82&86 <i>Native</i>          | 500             | 4.19          |
| IodoPhe 82&86 <i>i</i>               | 508             | 64.74         |
| MethoxyPhe 82&86 <i>Native</i>       | 513             | 3.53          |
| MethoxyPhe 82&86 <i>i</i>            | 526             | 48.73         |

doi:10.1371/journal.pone.0158579.t001

non-natural incorporation at position 82. Further, the double non-natural incorporation produces variants with a marked red-shifted wavelength of bioluminescence emission [46]. Most significantly, aequorin with L-4-methoxyphenylalanine at positions 82 and 86 complexed with coelenterazine *i* emits maximal bioluminescence at 526 nm, which is the largest red-shift of wavelength of any aequorin variant reported thus far and 11 nm longer than the previous most red-shifted aequorin, namely, L-4-methoxyphenylalanine at position 82 [46]. Fig 3 shows the interactions of the tryptophan residue at position 86 with the coelenterazine molecule. By mutating the Trp86, the stability of the phenol ring moiety associated with the Tyr82-His16-Trp86 triad is affected by the change in the H-bond network. In examining the binding interactions of the amino acids in the binding pocket with the newly prepared variant aequorin with L-4-aminophenylalanine and L-4-methoxyphenylalanine, it is evident that these non-natural amino acids, which have an amino group and methoxy group, respectively, are capable of maintaining a polar interaction with coelenterazine, while L-4-bromophenylalanine and L-4-iodophenylalanine are not. We postulate that the loss of the H-bonds that stabilize the luciferin could explain the red-shifted emission wavelengths of the halogenated aequorin variants L-4-bromophenylalanine and L-4-iodophenylalanine. Also, the presence of iodine in a molecule can increase the transition probability of an electron in an excited singlet state to an excited triplet state, creating a shift in the emission spectra as well as the elongation of the half-life [62].

While all novel non-natural amino acid-modified aequorin variants show an increase in the half-lives of the bioluminescence emission, the most notable half-life changes are associated with the variants containing coelenterazine *i*. These variants display the longest bioluminescence decay half-lives with an average of approximately 1 minute, while the half-life of aequorin with native coelenterazine is approximately a half second (Table 1). Notably, the

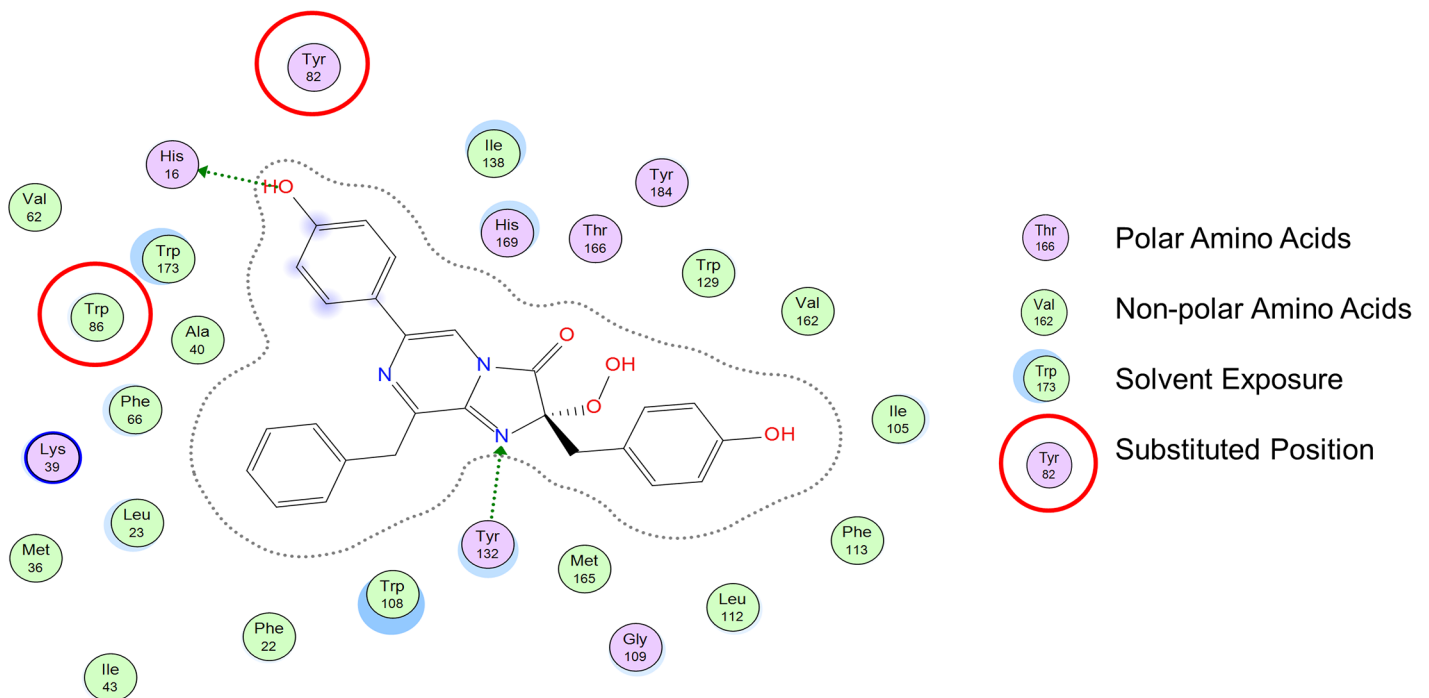

**Fig 3. Native coelenterazine in the binding pocket of aequorin.** The grey dashed lines represent the Van der Waal surface of the ligand. Green dashed lines with an arrowhead represent an H-bond going from donor to recipient. The structure is based on aequorin's crystal structure [43](PDB ID: 1EJ3). Reprinted from [47] under a CC BY license, with permission from *Open Access Dissertations*, original copyright 2015.

doi:10.1371/journal.pone.0158579.g003

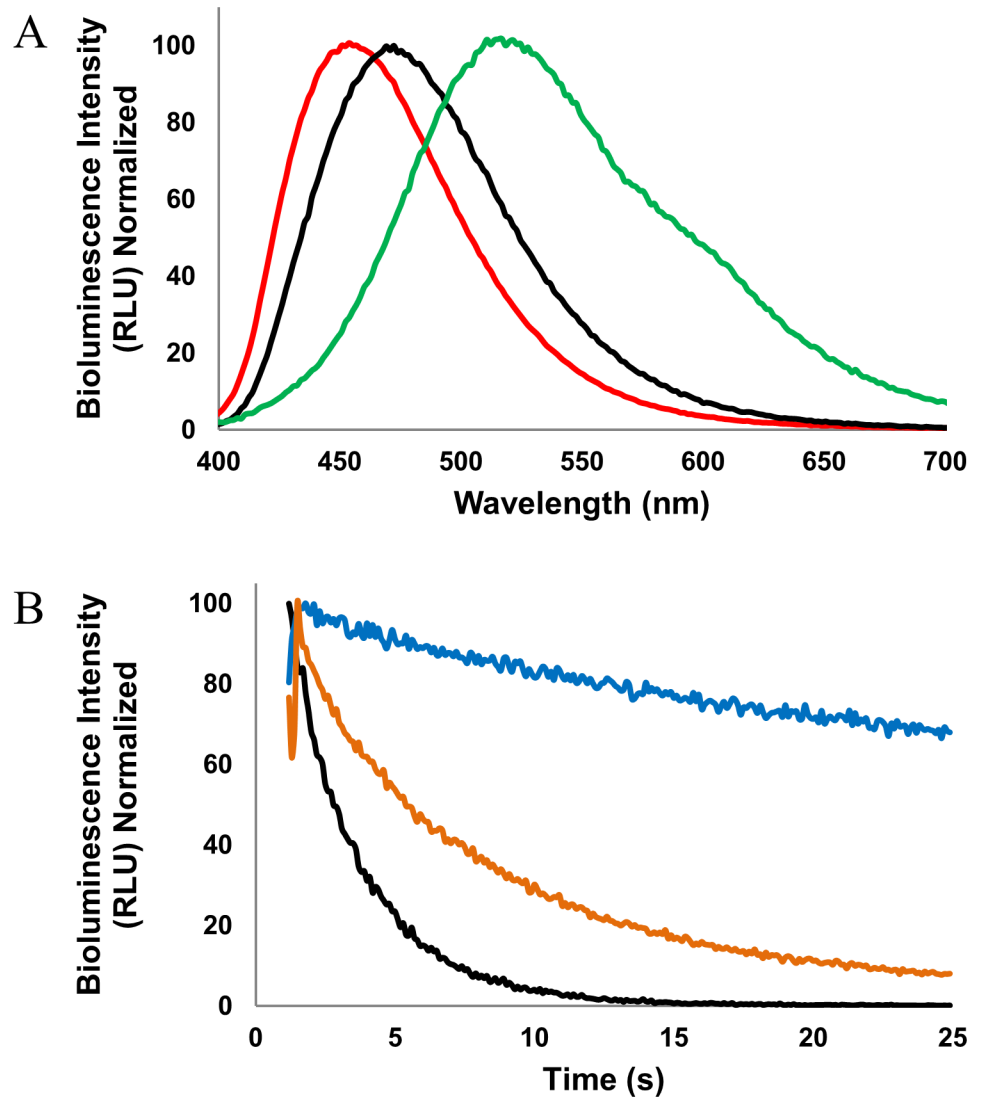

**Fig 4. Emission wavelengths and bioluminescence half-lives of selected aequorin variants.** (A) Bioluminescence emission spectra of aequorin with L-4-aminophenylalanine at position 86 with coelenterazine *cp* (red), aequorin with native coelenterazine (black), and L-4-methoxyphenylalanine at position 82 and 86 with coelenterazine *i* (green), illustrating the range of emission wavelengths in this study. (B) Half-life bioluminescence decay of aequorin with native coelenterazine (black), L-4-methoxyphenylalanine with coelenterazine *n* (orange), and L-4-iodophenylalanine with coelenterazine *i* (blue), illustrating the range of emission half-lives in this study. Reprinted from [47] under a CC BY license, with permission from *Open Access Dissertations*, original copyright 2015.

doi:10.1371/journal.pone.0158579.g004

aequorin variant with a double substitution of L-4-iodophenylalanine at positions 82 and 86 paired with coelenterazine *i* has the longest bioluminescence half-life emission time reported as well at approximately 60 s, compared to our own previously reported 14 s with a single L-4-methoxyphenylalanine at position 82 paired with coelenterazine *i* (Fig 4) [46].

The increased probability of the transition of the excited electron from singlet state to triplet state due to the heavy atom can explain the differences in half-lives of the coelenterazines that have iodine compared to the ones that do not possess a heavy atom [62]. This trend is also present in the modified aequorins with a L-4-bromophenylalanine substitution, though to a

lesser extent. Interestingly, in our previous work, the single substitution of Tyr82 did not display as great an increase in the half-life of the bioluminescence emission as the single substitution at position Trp86, even with coelenterazine *i*, but, in contrast, they did exhibit greater red-shift in emission wavelength. The variants with non-natural amino acid substitutions at both positions, Tyr82 and Trp86, show a mixed influence of both substitutions, with longer emission half-lives as well as greater red-shifted emission spectra. These emission characteristics may allow for multiplex detection by spatial and temporal resolution through the differentiation of the emission wavelength and time [51].

The feasibility of employing the red-shifted aequorin variants for *in vivo* imaging was explored by injecting the photoproteins into the right eyes (intrastromal as well as antechamber) of anesthetized mice, chosen for their easy accessibility and simple anatomy as well as for the potential to replace fluorescence in eye studies. The variants with L-4-methoxyphenylalanine at positions 82 and 86 and L-4-iodophenylalanine at positions 82 and 86 were chosen for their red-shifted emission wavelength and long bioluminescence half-life, respectively. The left eyes of the mice were only injected with buffers to serve as internal controls. Additionally, mice without aequorin injected into either eye were imaged. Fig 5 shows the imaging experiments performed by intrastromal injection of identical concentrations of aequorin and L-4-methoxyphenylalanine variants. Native coelenterazine was added to the surface of the eye dropwise to turn “on” the light, that is, trigger the emission of the flash of bioluminescence from the photoproteins, which was immediately recorded by the IVIS. External addition of calcium ions was not necessary since the eye already contains an abundance of calcium ions. Fig 5 also shows bioluminescence emission from the aequorin and the L-4-iodophenylalanine variant injected into the antechamber of the eye. The L-4-iodophenylalanine variant was added at a greater concentration due to the lower specific activity exhibited in the *in vitro* studies (S2 Table). The mice were observed for up to 1 1/2 hours after the addition of the coelenterazine and still displayed bioluminescence, attributed to the time necessary for the coelenterazine to diffuse to the aequorin. There was also no bioluminescent signal outside of the eye itself, demonstrating that

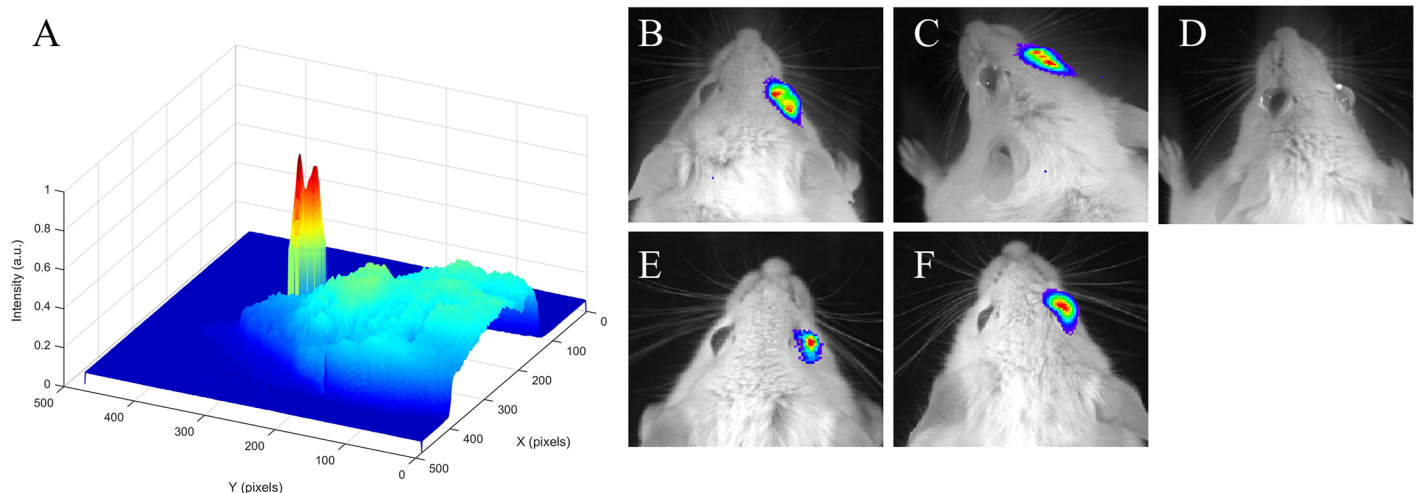

**Fig 5. Bioluminescence emission of selected aequorin variants in an *in vivo* mouse model.** Mice received a 5  $\mu$ L intrastromal or antechamber injection in the right eye with variant aequorin and the left eye with HEPES Buffer. (A,B) Aequorin injected intrastromally at a concentration of  $2.7 \times 10^{-5}$  M, 30 s exposure. (C) Aequorin with L-4-methoxyphenylalanine at positions 82 and 86. (D) HEPES Buffer only in both eyes. (E) Aequorin injected in the antechamber at a concentration of  $3.2 \times 10^{-5}$  M, 60 s exposure. (F) Aequorin with L-4-iodophenylalanine at positions 82 and 86. Images generated with Matlab R2014b and LivingImage 4.4. Reprinted from [47] under a CC BY license, with permission from *Open Access Dissertations*, original copyright 2015.

doi:10.1371/journal.pone.0158579.g005



the aequorin did not diffuse to other areas after injection. These results with *in vivo* imaging suggest that these red-shifted aequorin variants could also be used for imaging studies in other tissues or organs in animals in the future. Bioluminescent resonance energy transfer (BRET) employing aequorin has been demonstrated effective in deep tissue studies, thus suggesting that the aequorin designed, prepared, and employed herein could potentially be translated to applications in deeper tissues [63, 64].

## Conclusions

In conclusion, our data demonstrate that aequorin variants containing non-natural amino acids in place of the tryptophan residue at position 86 and the tyrosine at position 82 showed red-shifted bioluminescence activity when complexed with native coelenterazine. Moreover, the peak emission wavelengths and half-lives of these variants can further be extended by using coelenterazine analogs. Though not all the mutants showed a significant shift and displayed a drop in specific activity associated with coelenterazine analogs, several had shifts beyond 45 nm and were tested *in vivo*. The aequorin variant with L-4-methoxyphenylalanine at positions 82 and 86 with complexed coelenterazine *i* displays a  $\Delta 56$  nm red-shift in bioluminescence emission wavelength, being 526 nm the greatest red-shift reported thus far for an aequorin variant. Thus, this broadens the realm of applications of aequorin variants as reporter molecules in multiplex applications and *in vivo* imaging. These red-shifted aequorin variants showed excellent performance in imaging experiments when applied to the eye of a mouse, thus demonstrating their potential use in molecular imaging for diagnostics and/or management of disease. In summary, the red-shifted aequorin variants prepared and reported herein demonstrated improved characteristics for *in vivo* imaging with regard to our previously reported photoproteins, broadening the applications of aequorin in biomedical analysis and diagnostics.

## Materials and Methods

### Ethics statement

All animal procedures were performed in compliance with the Association for Research and Vision in Ophthalmology (ARVO) Statement for the use of Animals in Ophthalmic and Vision Research and in accordance with the Guide for the Care and Use of Laboratory Animals (protocol 13–034) published by the National Institutes of Health and approved by the Animal Care and Use Committee of the University of Miami.

### Reagents

The pBAD/His A and Terrific Broth (TB) are from Invitrogen (Carlsbad, CA). The PET-30 Xa/LIC Kit and Xa Factor Cleavage Capture Kit are from Novagen (Madison, WI). NcoI and HindIII restriction endonucleases are from New England Biolabs (Boston, MA). All natural amino acids, and all antibiotics, are from Sigma-Aldrich (St. Louis, MO). LB agar and LB broth are from Fischer Scientific (Fair Lawn, NJ). The coelenterazines are from Gold Biotechnology (St. Louis, MO). The L-4-aminophenylalanine, L-4-bromophenylalanine, L-4-iodophenylalanine, and L-4-methoxyphenylalanine are from Peptech (Burlington, MA).

### Apparatus

Cells were grown in a Thermo-Fisher Scientific orbital shaker incubator at 37°C. Cell cultures were harvested using a Beckman J2-MI centrifuge. The proteins were purified using a BioCad Sprint Perfusion Chromatography System (Perceptive Biosystems, Farmington, MA) using 20 mL DEAE Waters AP-2 Anion Exchange Column (Waters Corporation, Milford, MA). The

buffers for the purification of the protein were 30 mM Tris-HCl, pH 7.5, containing 2 mM EDTA (Buffer A) and 30 mM Tris-HCl, pH 7.5, containing 2 mM EDTA, and 1 M NaCl (Buffer B). Diafiltration was performed using a tangential flow separation module with hollow fiber filter membrane (Spectrum Labs, Rancho Dominguez, CA) using 30 mM Tris-HCl, pH 7.5, containing 2 mM EDTA. Ni-NTA Agarose beads are from Qiagen (Venlo, Netherlands). Amicon Ultra-15 Centrifugal Filter Units are from EMD (Billerica, MA). Purity of the proteins was confirmed by the appearance of a single band after sodium dodecyl sulfate-polyacrylamide gel electrophoresis (SDS-PAGE) using a Novex Mini-cell apparatus from Invitrogen and staining with Coomassie Brilliant Blue. Aequorin activity was measured using an Optocomp I luminometer (MGM Biomedical Hamden, CT). The emission spectra of the aequorins were determined using a custom made SpectroScan instrument (ScienceWares, Falmouth, MA), which is capable of obtaining spectra from flash reactions of luminescent samples that emit in the 400–700 nm range. Half-life scans were taken using a Polarstar Optimax 96 well microplate reading luminometer (BMG Labtech, Ortenberg, Germany).

### Construction of the pDULE-pBADHisA-AEQTAG86 expression strains

Four pDULE vectors which allow for the site-specific incorporation of four different non-natural amino acids were obtained from Dr. Peter Schultz (Scripps Research Institute, La Jolla CA) and Dr. Ryan Mehl (Franklyn and Marshall College, Lancaster, PA) [61]. Each of these pDULE plasmids coded for a tRNA<sub>CUA</sub> and tRNA<sub>CUA</sub>-synthetase specific for the TAG codon and a single non-natural amino acid, either L-4-aminophenylalanine, L-4-bromophenylalanine, L-4-iodophenylalanine, or L-4-methoxyphenylalanine. These plasmids were transformed into *Escherichia coli* DH10B cells and transformants were selected by plating on LB agar medium containing ampicillin (100 µg/mL) and tetracycline (12 µg/mL). The presence of the pDULE plasmid was confirmed by plasmid isolation, restriction enzyme digestion and DNA gel electrophoresis.

### Construction of the pDULE-pET30AEQ8286TAG expression strains

The four pDULE plasmids were transformed into *E. coli* DH10B cells with pET30AEQ8286-TAG and transformants were selected by plating on LB agar medium containing tetracycline (12 µg/mL) and kanamycin (35 µg/mL). The presence of the pDULE plasmid was confirmed by plasmid isolation, restriction enzyme digestion and DNA gel electrophoresis.

pBADAEQ86TAG was prepared by inserting the AEQTAG86 gene with the ompA leader sequence attached into pBAD/HisA. The pIN4AEQ86TAG vector containing the cysteine-free aequorin gene fused to the ompA leader sequence was used as a template. The primers were designed so the resulting DNA sequence contained an NcoI site at the 5' end and a HindIII site at the 3' end.

The following primers were used for the cloning of ompA:AEQ86TAG fusion into pBAD/HisA vector (restriction sites for cloning are underlined).

**AEQforpBAD.** 5' -CCATGGGTATGAAAAAGACAGCTATCGCGATTGC-3'

**AEQrevpBAD.** 5' AAGCTTAGGGGACAGCTCCACCGTAGAGCTTTTCGGAAGCAGGATC  
CATTGTGTAC-3'

The resulting PCR product was gel purified and cloned into the pCR<sup>®</sup> II-TOPO<sup>®</sup> vector by using the TOPO TA cloning kit (Invitrogen, Carlsbad, CA). The plasmid from the TA clone was then isolated and sequenced to confirm the presence of the insert. The ompA:AEQ86TAG insert from the TOPO TA clone was then ligated into the NcoI and HindIII sites of pBAD/HisA to create pBADHisA-AEQ86TAG.

The AEQTAG86 gene was also cloned into a pET30 Xa/LIC Vector using primers designed according to the manufacturer's instructions. pET30AEQ8286TAG was then prepared by using a pair of primers to create a site-specific mutation consisting of a TAG at position 82 (underlined).

**Oligo HPLCTAG8286for.** 5' -GGAAACTGATTGGCCTGCATAGATTGAAGG-3'

**HPLCTAG8286rev.** 5' -CCTTCAATCTATGCAGGCCAATCAGTTTCC-3'

pBADHisA-AEQ86TAG and pET30AEQ8286TAG vectors were transformed into chemically competent *E. coli* DH10B cells that already contained the pDULE plasmids to produce four different strains, each specific for the incorporation one of the four non-natural amino acids mentioned above. Selection for transformants was performed by plating on LB agar medium containing both ampicillin (100 µg/mL) kanamycin (35 µg/mL) for cells containing pBADHisA-AEQ86TAG and tetracycline (12 µg/mL) and kanamycin (35 µg/mL) for cells containing pET30AEQ8286TAG.

### Expression and isolation of aequorin variants from pBADHisA-AEQ86TAG

The cells harboring the pDULE systems with pBADHisA-AEQ86TAG vector were grown in 25 mL of LB broth containing ampicillin (100 µg/mL) and tetracycline (12 µg/mL). All cultures, unless specified otherwise, were grown overnight at 37°C with shaking at 250 rpm. These overnight cultures were used to inoculate 500 mL of LB broth containing the appropriate antibiotics and the cultures were grown at 37°C at 250 rpm to an OD<sub>600</sub> between 0.4–0.6. The corresponding non-natural amino acid was then added to a final concentration of 1 mM. The culture was allowed to grow for 1 hour and then induced with arabinose (0.2% final concentration) overnight.

The culture was centrifuged at 15,300 xg for 20 min and the pellet discarded. The supernatant was acid precipitated using 12 M HCl, then spun again. The pellet was resuspended in Tris-HCl, pH 7.5, containing 2 mM EDTA.

### Expression and isolation of aequorin variants from pET30AEQ8286TAG

The cells were grown in 25 mL of Terrific broth (TB) containing tetracycline (12 µg/mL) and kanamycin (35 µg/mL) overnight at 37°C at 250 rpm. The overnight cultures were used to inoculate 500 mL of TB broth containing the same antibiotics and the cultures were grown at 37°C at 250 rpm. After growing to an OD<sub>600</sub> between 0.4–0.6, the corresponding non-natural amino acid was added to a final concentration of 1 mM. The culture was allowed to grow for 1 hour and then induced with 1 mM IPTG and grown overnight.

The culture was centrifuged at 15,300 xg for 20 min and the pellet was boiled for 5 min in Native Purification Buffer (50 mM NaH<sub>2</sub>PO<sub>4</sub>, 0.5 M NaCl, 1 mM Imidazole, pH = 8.0). The boiled pellet was centrifuged again and the supernatant added to 1 mL of suspended Ni-NTA agarose beads and rotated on a Mini Labroller (Labnet, Woodridge, NJ) at room temperature for 2 hours. The protein was eluted off the column using a PBS Buffer with 20 mM imidazole at pH = 8.0 and digested with Xa factor according to manufacturer's instructions until all the His tag was cleaved from the protein. The Xa factor was removed with Xa factor Agarose capture beads. The cleaved aequorin was then concentrated using Amicon Ultra spin columns.

### Determination of activities of aequorin variants

Aequorin was diluted with 30 mM Tris-HCl, pH 7.5, containing 2 mM EDTA, to 1x10<sup>-7</sup> M and charged with 1x10<sup>-4</sup> M coelenterazine overnight. Aequorin activity was triggered by injecting 100 µL of 100 mM Tris-HCl, pH 7.5, containing 100 mM CaCl<sub>2</sub>. Bioluminescence intensity was measured at 0.1 s intervals for up to 6 s on an Optocomp I luminometer (MGM)

Biomedical Hamden, CT). Units are in Relative Light Units (RLU) per mole.  $N = 3$  or more, standard deviation is 5% or less.

### Emission spectra of aequorin variants

A  $1 \times 10^{-6}$  M sample of each aequorin was charged by incubating overnight at  $4^{\circ}\text{C}$  with  $1 \times 10^{-4}$  M of each of the different coelenterazines and 150  $\mu\text{L}$  of each charged aequorin was pipetted into a 96-well microtiter plate and following injection of 100  $\mu\text{L}$  of 100 mM Tris-HCl, pH 7.5, containing 100 mM  $\text{CaCl}_2$ , the emission spectra was collected for 10 s over a scanning range of 400–700 nm in 1.5 nm increments on a custom made SpectroScan instrument (ScienceWares, Falmouth, MA).  $N = 3$  or more, standard deviation is 5% or less.

### Half-life determination of aequorin variants

A  $1 \times 10^{-6}$  M sample of each aequorin variant was charged overnight at  $4^{\circ}\text{C}$  with the  $1 \times 10^{-4}$  M of the coelenterazine analogue used during the collection of emission spectra. A Polarstar Opti-max 96 well microplate luminometer (BMG Labtech, Ortenberg, Germany) was utilized for the half-life measurements. Filters were not required. The bioluminescence signal of a 50  $\mu\text{L}$  sample was collected between 30 s to 150 s, depending on the expected half-life of the aequorin analogue, following the injection of 100  $\mu\text{L}$  of triggering buffer (100 mM Tris-HCl, pH 7.5, containing 100 mM  $\text{CaCl}_2$ ). The mean bioluminescence decay spectra was fit with an exponential decay equation using GraphPad Prism 5.0 (GraphPad Software, San Diego, CA), and an equation for first order decay kinetics was used to calculate the bioluminescence half-life of each aequorin-coelenterazine pair.  $N = 3$  or more, standard deviation is 5% or less.

### Mass spectrometry

Proteins were run on SDS-PAGE and cut out of the stained gels with Coomassie Blue. Gel pieces were digested with trypsin, and an LC-ESI-MS-MS was performed using a ThermoFinnigan LTQ. Resulting MS-MS spectra were compared with proteins in the Swiss-Prot database using the X!Tandem search engine to look for the presence of the substitution of the non-natural amino acid at and only at the target positions.

### *In vivo* imaging

The aequorin variants were dissolved in a HEPES Buffer (10 mM HEPES, 0.15 M NaCl at pH = 7.4) at concentrations from  $9.1 \times 10^{-6}$  M to  $4.5 \times 10^{-5}$  M. All mice were anesthetized with a 100  $\mu\text{L}$  ketamine/xylazine (1.5 mg/0.3 mg) by intraperitoneal injection before the injection of the sample. The aequorin samples were injected into one eye of six mice via intrastromal injection in 5  $\mu\text{L}$  volumes, or into the antechamber at a volume of 10  $\mu\text{L}$ , of each of the ICR (CD1) outbred female mice (6–8 weeks old, purchased from Taconic (Germantown, NY)). The same volumes of plain HEPES were injected into the other eye to serve as an internal control. Native coelenterazine was diluted in PBS buffer to a volume of  $2.3 \times 10^{-4}$  M and dropped onto the surface of each eye in 1  $\mu\text{L}$  volumes. The mice were then placed in a Caliper/Xenogen IVIS<sup>®</sup> SPECTRUM (Caliper, Hopkinton, MA) in the IVIS Small Animal Imaging Facility at the Oncogenomics Core Facility, Miller School of Medicine, with oxygen flowing into the imaging chamber. Images were taken over 30 s to 60 s.

### Supporting Information

**S1 Fig. Plasmids for expression of aequorin variant proteins.** (A) pBAD-based plasmid inducible by arabinose for the expression of variant aequorin with a singular amber mutation

at position 86. (B) pET30-based plasmid inducible by IPTG for the expression of aequorin with an amber mutation at positions 82 and 86 and the sequence encoding for a His6xtag at the N-terminus.

(DOC)

**S2 Fig. SDS Gel Showing Purified Aequorin and Aequorin with L-4-iodophenylalanine at position 82 and 86.**

(DOC)

**S1 Table. Mass spectrometry data for the aequorin mutants.** (A) Mass spectrometry for a single substitution. Tryptophan 86 is located at the end of the peptide fragment (W\*). (B) Mass spectrometry data for a double substitution. Tyrosine 82 is located near the middle of the fragment (Y\*).

(DOC)

**S2 Table. Specific activity of aequorin variants: (A) Single substitution at position 86 and (B) Double substitution aequorin variants at positions 82 and 86.**

(DOC)

**S3 Table. Emission wavelengths of aequorin variants.** (A) Single substitution at position 86 and (B) Double substitutions at 82 and 86 in nm. N = 3 or more, standard deviation is 5% or less.

(DOC)

**S4 Table. Emission half-lives of aequorin variants.** (A) Single substitution at position 86 and (B) Double substitutions at 82 and 86. The half-life values of the bioluminescence are in s. N = 3 or more, standard deviation is 5% or less.

(DOC)

**S5 Table. Mass Spectrometry Data for AminoPhe86AEQ.**

(DOC)

**S6 Table. Mass Spectrometry Data for BromoPhe86AEQ.**

(DOC)

**S7 Table. Mass Spectrometry Data for IodoPhe86AEQ.**

(DOC)

**S8 Table. Mass Spectrometry Data for MethoxyPhe86AEQ.**

(DOC)

**S9 Table. Mass Spectrometry Data for BromoPhe8286AEQ.**

(DOC)

**S10 Table. Mass Spectrometry Data for IodoPhe8286AEQ.**

(DOC)

**S11 Table. Mass Spectrometry Data for MethoxyPhe8286AEQ.**

(DOC)

## Acknowledgments

S.D. is grateful for the financial support by the Lucille P. Markey Chair from the Miller School of Medicine of the University of Miami. The authors are grateful to Dr. Peter Schultz of the Scripps Research Institute, La Jolla, CA for generously donating the pDULE plasmid.

## Author Contributions

Conceived and designed the experiments: KG LR PD SD. Performed the experiments: KG PD. Analyzed the data: KG CE ED. Contributed reagents/materials/analysis tools: KG LR CE ED. Wrote the paper: KG LR CE SJ ED PD JZ SD.

## References

1. Negrin RS, Contag CH. In vivo imaging using bioluminescence: a tool for probing graft-versus-host disease. *Nature reviews Immunology*. 2006; 6(6):484–90. doi: [10.1038/nri1879](https://doi.org/10.1038/nri1879) PMID: [16724101](https://pubmed.ncbi.nlm.nih.gov/16724101/).
2. Shinde R, Perkins J, Contag CH. Luciferin derivatives for enhanced in vitro and in vivo bioluminescence assays. *Biochemistry*. 2006; 45(37):11103–12. doi: [10.1021/bi060475o](https://doi.org/10.1021/bi060475o) PMID: [16964971](https://pubmed.ncbi.nlm.nih.gov/16964971/).
3. Photoproteins in Bioanalysis. Daunert S, Deo S, editors. Weinheim, DE: Wiley-VCH; 2006. 240 p.
4. De A, Gambhir SS. Noninvasive imaging of protein-protein interactions from live cells and living subjects using bioluminescence resonance energy transfer. *FASEB journal: official publication of the Federation of American Societies for Experimental Biology*. 2005; 19(14):2017–9. doi: [10.1096/fj.05-4628fje](https://doi.org/10.1096/fj.05-4628fje) PMID: [16204354](https://pubmed.ncbi.nlm.nih.gov/16204354/).
5. Dothager RS, Flentie K, Moss B, Pan MH, Kesarwala A, Piwnica-Worms D. Advances in bioluminescence imaging of live animal models. *Current opinion in biotechnology*. 2009; 20(1):45–53. doi: [10.1016/j.copbio.2009.01.007](https://doi.org/10.1016/j.copbio.2009.01.007) PMID: [19233638](https://pubmed.ncbi.nlm.nih.gov/19233638/); PubMed Central PMCID: [PMC2680462](https://pubmed.ncbi.nlm.nih.gov/PMC2680462/).
6. Dragulescu-Andrasi A, Chan CT, De A, Massoud TF, Gambhir SS. Bioluminescence resonance energy transfer (BRET) imaging of protein-protein interactions within deep tissues of living subjects. *Proceedings of the National Academy of Sciences of the United States of America*. 2011; 108(29):12060–5. doi: [10.1073/pnas.1100923108](https://doi.org/10.1073/pnas.1100923108) PMID: [21730157](https://pubmed.ncbi.nlm.nih.gov/21730157/); PubMed Central PMCID: [PMC3141927](https://pubmed.ncbi.nlm.nih.gov/PMC3141927/).
7. Prescher JA, Contag CH. Guided by the light: visualizing biomolecular processes in living animals with bioluminescence. *Current opinion in chemical biology*. 2010; 14(1):80–9. doi: [10.1016/j.cbpa.2009.11.001](https://doi.org/10.1016/j.cbpa.2009.11.001) PMID: [19962933](https://pubmed.ncbi.nlm.nih.gov/19962933/).
8. Rowe L, Dikici E, Daunert S. Engineering Bioluminescent Proteins: Expanding their Analytical Potential. *Anal Chem*. 2009; 81(21):8662–8. doi: [10.1021/Ac9007286](https://doi.org/10.1021/Ac9007286). ISI:000276191900007. PMID: [19725502](https://pubmed.ncbi.nlm.nih.gov/19725502/)
9. Cai W, Chen X. Nanoplatfoms for targeted molecular imaging in living subjects. *Small*. 2007; 3(11):1840–54. doi: [10.1002/smll.200700351](https://doi.org/10.1002/smll.200700351) PMID: [17943716](https://pubmed.ncbi.nlm.nih.gov/17943716/).
10. Choy G, O'Connor S, Diehn FE, Costouros N, Alexander HR, Choyke P, et al. Comparison of noninvasive fluorescent and bioluminescent small animal optical imaging. *BioTechniques*. 2003; 35(5):1022–6, 8–30. PMID: [14628676](https://pubmed.ncbi.nlm.nih.gov/14628676/).
11. Massoud TF, Gambhir SS. Molecular imaging in living subjects: seeing fundamental biological processes in a new light. *Genes & development*. 2003; 17(5):545–80. doi: [10.1101/gad.1047403](https://doi.org/10.1101/gad.1047403) PMID: [12629038](https://pubmed.ncbi.nlm.nih.gov/12629038/).
12. O'Neill K, Lyons SK, Gallagher WM, Curran KM, Byrne AT. Bioluminescent imaging: a critical tool in pre-clinical oncology research. *The Journal of pathology*. 2010; 220(3):317–27. doi: [10.1002/path.2656](https://doi.org/10.1002/path.2656) PMID: [19967724](https://pubmed.ncbi.nlm.nih.gov/19967724/).
13. Pantaleo MA, Nannini M, Maleddu A, Fanti S, Ambrosini V, Nanni C, et al. Conventional and novel PET tracers for imaging in oncology in the era of molecular therapy. *Cancer treatment reviews*. 2008; 34(2):103–21. doi: [10.1016/j.ctrv.2007.10.001](https://doi.org/10.1016/j.ctrv.2007.10.001) PMID: [18055120](https://pubmed.ncbi.nlm.nih.gov/18055120/).
14. Razgulin A, Ma N, Rao J. Strategies for in vivo imaging of enzyme activity: an overview and recent advances. *Chemical Society reviews*. 2011; 40(7):4186–216. doi: [10.1039/c1cs15035a](https://doi.org/10.1039/c1cs15035a) PMID: [21552609](https://pubmed.ncbi.nlm.nih.gov/21552609/).
15. Weissleder R, Pittet MJ. Imaging in the era of molecular oncology. *Nature*. 2008; 452(7187):580–9. doi: [10.1038/nature06917](https://doi.org/10.1038/nature06917) PMID: [18385732](https://pubmed.ncbi.nlm.nih.gov/18385732/); PubMed Central PMCID: [PMC2708079](https://pubmed.ncbi.nlm.nih.gov/PMC2708079/).
16. Bhaumik S, Gambhir SS. Optical imaging of Renilla luciferase reporter gene expression in living mice. *Proceedings of the National Academy of Sciences of the United States of America*. 2002; 99(1):377–82. doi: [10.1073/pnas.012611099](https://doi.org/10.1073/pnas.012611099) PMID: [11752410](https://pubmed.ncbi.nlm.nih.gov/11752410/); PubMed Central PMCID: [PMC117568](https://pubmed.ncbi.nlm.nih.gov/PMC117568/).
17. Bhaumik S, Lewis XZ, Gambhir SS. Optical imaging of Renilla luciferase, synthetic Renilla luciferase, and firefly luciferase reporter gene expression in living mice. *Journal of biomedical optics*. 2004; 9(3):578–86. doi: [10.1117/1.1647546](https://doi.org/10.1117/1.1647546) PMID: [15189096](https://pubmed.ncbi.nlm.nih.gov/15189096/).
18. De A, Loening AM, Gambhir SS. An improved bioluminescence resonance energy transfer strategy for imaging intracellular events in single cells and living subjects. *Cancer research*. 2007; 67(15):7175–83. doi: [10.1158/0008-5472.CAN-06-4623](https://doi.org/10.1158/0008-5472.CAN-06-4623) PMID: [17671185](https://pubmed.ncbi.nlm.nih.gov/17671185/).

19. Massoud TF, Paulmurugan R, Gambhir SS. Molecular imaging of homodimeric protein-protein interactions in living subjects. *FASEB journal: official publication of the Federation of American Societies for Experimental Biology*. 2004; 18(10):1105–7. doi: [10.1096/fj.03-1128fje](https://doi.org/10.1096/fj.03-1128fje) PMID: [15132989](https://pubmed.ncbi.nlm.nih.gov/15132989/).
20. Close DM, Xu T, Saylor GS, Ripp S. In vivo bioluminescent imaging (BLI): noninvasive visualization and interrogation of biological processes in living animals. *Sensors*. 2011; 11(1):180–206. doi: [10.3390/s110100180](https://doi.org/10.3390/s110100180) PMID: [22346573](https://pubmed.ncbi.nlm.nih.gov/22346573/); PubMed Central PMCID: PMC3274065.
21. Zinn KR, Chaudhuri TR, Szafran AA, O'Quinn D, Weaver C, Dugger K, et al. Noninvasive Bioluminescence Imaging in Small Animals. *ILAR Journal*. 2008; 49(1):103–15. doi: [10.1093/ilar.49.1.103](https://doi.org/10.1093/ilar.49.1.103) PMID: [18172337](https://pubmed.ncbi.nlm.nih.gov/18172337/)
22. Leppanen O, Bjornheden T, Evaldsson M, Boren J, Wiklund O, Levin M. ATP depletion in macrophages in the core of advanced rabbit atherosclerotic plaques in vivo. *Atherosclerosis*. 2006; 188(2):323–30. doi: [10.1016/j.atherosclerosis.2005.11.017](https://doi.org/10.1016/j.atherosclerosis.2005.11.017) PMID: [16405894](https://pubmed.ncbi.nlm.nih.gov/16405894/).
23. Luo J, Lin AH, Maslah E, Wyss-Coray T. Bioluminescence imaging of Smad signaling in living mice shows correlation with excitotoxic neurodegeneration. *Proceedings of the National Academy of Sciences of the United States of America*. 2006; 103(48):18326–31. doi: [10.1073/pnas.0605077103](https://doi.org/10.1073/pnas.0605077103) PMID: [17110447](https://pubmed.ncbi.nlm.nih.gov/17110447/); PubMed Central PMCID: PMC1838750.
24. Curie T, Rogers KL, Colasante C, Bulet P. Red-shifted aequorin-based bioluminescent reporters for in vivo imaging of Ca2 signaling. *Molecular imaging*. 2007; 6(1):30–42. PMID: [17311763](https://pubmed.ncbi.nlm.nih.gov/17311763/).
25. Johnsn FH, Shimomura O. Preparation and use of aequorin for rapid microdetermination of Ca 2+ in biological systems. *Nature: New biology*. 1972; 237(78):287–8. Epub 1972/06/28. PMID: [4402563](https://pubmed.ncbi.nlm.nih.gov/4402563/).
26. Shimomura O, Johnson FH, Saiga Y. Extraction, purification and properties of aequorin, a bioluminescent protein from the luminous hydromedusan, *Aequorea*. *Journal of cellular and comparative physiology*. 1962; 59:223–39. Epub 1962/06/01. PMID: [13911999](https://pubmed.ncbi.nlm.nih.gov/13911999/).
27. Ordenes VR, Moreno I, Maturana D, Norambuena L, Trewavas AJ, Orellana A. In vivo analysis of the calcium signature in the plant Golgi apparatus reveals unique dynamics. *Cell calcium*. 2012; 52(5):397–404. doi: [10.1016/j.ceca.2012.06.008](https://doi.org/10.1016/j.ceca.2012.06.008) PMID: [22831913](https://pubmed.ncbi.nlm.nih.gov/22831913/).
28. Markova O, Lenne PF. Calcium signaling in developing embryos: focus on the regulation of cell shape changes and collective movements. *Seminars in cell & developmental biology*. 2012; 23(3):298–307. doi: [10.1016/j.semcdb.2012.03.006](https://doi.org/10.1016/j.semcdb.2012.03.006) PMID: [22414534](https://pubmed.ncbi.nlm.nih.gov/22414534/).
29. Teasley Hamorsky K, Ensor CM, Wei Y, Daunert S. A bioluminescent molecular switch for glucose. *Angew Chem Int Ed Engl*. 2008; 47(20):3718–21. Epub 2008/04/03. doi: [10.1002/anie.200704440](https://doi.org/10.1002/anie.200704440) PMID: [18383457](https://pubmed.ncbi.nlm.nih.gov/18383457/).
30. Teasley Hamorsky K, Ensor CM, Dikici E, Pasini P, Bachas L, Daunert S. Bioluminescence inhibition assay for the detection of hydroxylated polychlorinated biphenyls. *Anal Chem*. 2012; 84(18):7648–55. Epub 2012/08/23. doi: [10.1021/ac301872u](https://doi.org/10.1021/ac301872u) PMID: [22908962](https://pubmed.ncbi.nlm.nih.gov/22908962/).
31. Scott D, Hamorsky KT, Ensor CM, Anderson KW, Daunert S. Cyclic AMP receptor protein-aequorin molecular switch for cyclic AMP. *Bioconjugate chemistry*. 2011; 22(3):475–81. Epub 2011/02/19. doi: [10.1021/bc100486b](https://doi.org/10.1021/bc100486b) PMID: [21329338](https://pubmed.ncbi.nlm.nih.gov/21329338/); PubMed Central PMCID: PMC3090682.
32. Hamorsky KT, Ensor CM, Pasini P, Daunert S. A protein switch sensing system for the quantification of sulfate. *Analytical biochemistry*. 2012; 421(1):172–80. Epub 2011/11/10. doi: [10.1016/j.ab.2011.10.023](https://doi.org/10.1016/j.ab.2011.10.023) PMID: [22067979](https://pubmed.ncbi.nlm.nih.gov/22067979/); PubMed Central PMCID: PMC3457053.
33. Zenno S, Inouye S. Bioluminescent immunoassay using a fusion protein of protein A and the photoprotein aequorin. *Biochemical and biophysical research communications*. 1990; 171(1):169–74. Epub 1990/08/31. PMID: [2203343](https://pubmed.ncbi.nlm.nih.gov/2203343/).
34. Qu X, Deo SK, Dikici E, Ensor M, Poon M, Daunert S. Bioluminescence immunoassay for angiotensin II using aequorin as a label. *Analytical biochemistry*. 2007; 371(2):154–61. Epub 2007/10/13. doi: [10.1016/j.ab.2007.08.038](https://doi.org/10.1016/j.ab.2007.08.038) PMID: [17931588](https://pubmed.ncbi.nlm.nih.gov/17931588/).
35. Mirasoli M, Deo SK, Lewis JC, Roda A, Daunert S. Bioluminescence immunoassay for cortisol using recombinant aequorin as a label. *Analytical biochemistry*. 2002; 306(2):204–11. Epub 2002/07/19. PMID: [12123657](https://pubmed.ncbi.nlm.nih.gov/12123657/).
36. Lewis JC, Daunert S. Bioluminescence immunoassay for thyroxine employing genetically engineered mutant aequorins containing unique cysteine residues. *Anal Chem*. 2001; 73(14):3227–33. Epub 2001/07/31. PMID: [11476219](https://pubmed.ncbi.nlm.nih.gov/11476219/).
37. Desai UA, Wininger JA, Lewis JC, Ramanathan S, Daunert S. Using epitope-aequorin conjugate recognition in immunoassays for complex proteins. *Analytical biochemistry*. 2001; 294(2):132–40. Epub 2001/07/11. doi: [10.1006/abio.2001.5145](https://doi.org/10.1006/abio.2001.5145) PMID: [11444808](https://pubmed.ncbi.nlm.nih.gov/11444808/).
38. Deo SK, Lewis JC, Daunert S. C-terminal and n-terminal fusions of aequorin with small peptides in immunoassay development. *Bioconjugate chemistry*. 2001; 12(3):378–84. Epub 2001/05/17. PMID: [11353535](https://pubmed.ncbi.nlm.nih.gov/11353535/).

39. Deo SK, Daunert S. An immunoassay for Leu-enkephalin based on a C-terminal aequorin-peptide fusion. *Anal Chem*. 2001; 73(8):1903–8. Epub 2001/05/08. PMID: [11338609](#).
40. Rowe L, Deo S, Shofner J, Ensor M, Daunert S. Aequorin-based homogeneous cortisol immunoassay for analysis of saliva samples. *Bioconjugate chemistry*. 2007; 18(6):1772–7. Epub 2007/10/19. doi: [10.1021/bc070039u](#) PMID: [17941683](#).
41. Shrestha S, Paeng IR, Deo SK, Daunert S. Cysteine-free mutant of aequorin as a photolabel in immunoassay development. *Bioconjugate chemistry*. 2002; 13(2):269–75. Epub 2002/03/22. PMID: [11906264](#).
42. Inouye S, Noguchi M, Sakaki Y, Takagi Y, Miyata T, Iwanaga S, et al. Cloning and sequence analysis of cDNA for the luminescent protein aequorin. *Proceedings of the National Academy of Sciences of the United States of America*. 1985; 82(10):3154–8. Epub 1985/05/01. PMID: [3858813](#); PubMed Central PMCID: PMC397733.
43. Head JF, Inouye S, Teranishi K, Shimomura O. The crystal structure of the photoprotein aequorin at 2.3 Å resolution. *Nature*. 2000; 405(6784):372–6. Epub 2000/06/01. doi: [10.1038/35012659](#) PMID: [10830969](#).
44. Ereemeeva EV, Markova SV, Westphal AH, Visser AJWG, van Berkel WJH, Vysotski ES. The intrinsic fluorescence of apo-obelin and apo-aequorin and use of its quenching to characterize coelenterazine binding. *FEBS Lett*. 2009; 583(12):1939–44. doi: [10.1016/j.febslet.2009.04.043](#). ISI:000267797800020. PMID: [19426732](#)
45. Shimomura O, Musicki B, Kishi Y. Semi-synthetic aequorin. An improved tool for the measurement of calcium ion concentration. *The Biochemical journal*. 1988; 251(2):405–10. Epub 1988/04/15. PMID: [3401214](#); PubMed Central PMCID: PMC1149017.
46. Rowe L, Ensor M, Mehl R, Daunert S. Modulating the Bioluminescence Emission of Photoproteins by *In Vivo* Site-Directed Incorporation of Non-Natural Amino Acids. *ACS Chem Biol*. 2010; 5(5):455–60. doi: [10.1021/Cb9002909](#). ISI:000277865500004. PMID: [20230005](#)
47. Grinstead KM. Aequorin Mutants with Site-Specifically Incorporated Non-Natural Amino Acids for Biomedical Applications. Open Access Journals: University of Miami; 2015.
48. Lewis JC, Lopez-Moya JJ, Daunert S. Bioluminescence and secondary structure properties of aequorin mutants produced for site-specific conjugation and immobilization. *Bioconjugate chemistry*. 2000; 11(1):65–70. Epub 2000/01/19. PMID: [10639087](#).
49. Tsuzuki K, Tricoire L, Courjean O, Gibelin N, Rossier J, Lambolez B. Thermostable mutants of the photoprotein aequorin obtained by *in vitro* evolution. *J Biol Chem*. 2005; 280(40):34324–31. doi: [10.1074/jbc.M505303200](#). ISI:000232229700075. PMID: [15972815](#)
50. Tricoire L, Tsuzuki K., Courjean O., et al. Calcium Dependence of Aequorin Bioluminescence Dissected by Random Mutagenesis. *cPNAS*. 2006; 103(25):5.
51. Rowe L, Combs K, Deo S, Ensor C, Daunert S, Qu X. Genetically modified semisynthetic bioluminescent photoprotein variants: simultaneous dual-analyte assay in a single well employing time resolution of decay kinetics. *Anal Chem*. 2008; 80(22):8470–6. Epub 2008/10/22. doi: [10.1021/ac801209x](#) PMID: [18937418](#).
52. Dikici E, Qu X, et al. Aequorin variants with improved bioluminescence properties. *Protein engineering, design & selection: PEDS*. 2009; 22(4):243–8. Epub 2009/01/27. doi: [10.1093/protein/gzn083](#) PMID: [19168563](#); PubMed Central PMCID: PMC2659006.
53. Scott D, Dikici E, Ensor M, Daunert S. Bioluminescence and its impact on bioanalysis. *Annu Rev Anal Chem (Palo Alto Calif)*. 2011; 4:297–319. Epub 2011/04/05. doi: [10.1146/annurev-anchem-061010-113855](#) PMID: [21456969](#).
54. Qu X, Rowe L, Dikici E, Ensor M, Daunert S. Aequorin mutants with increased thermostability. *Analytical and bioanalytical chemistry*. 2014; 406(23):5639–43. doi: [10.1007/s00216-014-8039-6](#) PMID: [25084737](#); PubMed Central PMCID: PMC4157069.
55. Dikici E, Qu X, Rowe L, Millner L, Logue C, Deo SK, et al. Aequorin variants with improved bioluminescence properties. *Protein engineering, design & selection: PEDS*. 2009; 22(4):243–8. Epub 2009/01/27. doi: [10.1093/protein/gzn083](#) PMID: [19168563](#); PubMed Central PMCID: PMC2659006.
56. Lark AR, Kitamoto T, Martin JR. *In Vivo* Functional Brain Imaging Approach Based on Bioluminescent Calcium Indicator GFP-aequorin. *J Vis Exp*. 2016;(107: ). doi: [10.3791/53705](#) PMID: [26779599](#).
57. Lewis JC, Daunert S. Photoproteins as luminescent labels in binding assays. *Fresen J Anal Chem*. 2000; 366(6–7):760–8. ISI:000086661300025.
58. Rowe L, Rothert A, Logue C, Ensor CM, Deo SK, Daunert S. Spectral tuning of photoproteins by partnering site-directed mutagenesis strategies with the incorporation of chromophore analogs. *Protein engineering, design & selection: PEDS*. 2008; 21(2):73–81. Epub 2008/01/08. doi: [10.1093/protein/gzm073](#) PMID: [18175778](#).



59. Chatterjee A, Xiao H, Schultz PG. Evolution of multiple, mutually orthogonal prolyl-tRNA synthetase/tRNA pairs for unnatural amino acid mutagenesis in *Escherichia coli*. *Proceedings of the National Academy of Sciences of the United States of America*. 2012; 109(37):14841–6. doi: [10.1073/pnas.1212454109](https://doi.org/10.1073/pnas.1212454109) PMID: [22927411](https://pubmed.ncbi.nlm.nih.gov/22927411/); PubMed Central PMCID: PMC3443146.
60. Maniatis T, Fritsch EF, Sambrook J. *Molecular cloning: a laboratory manual*. Cold Spring Harbor, N.Y.: Cold Spring Harbor Laboratory; 1982. x, 545 p. p.
61. Liu CC, Schultz PG. Adding new chemistries to the genetic code. *Annual review of biochemistry*. 2010; 79:413–44. doi: [10.1146/annurev.biochem.052308.105824](https://doi.org/10.1146/annurev.biochem.052308.105824) PMID: [20307192](https://pubmed.ncbi.nlm.nih.gov/20307192/).
62. Nijegorodov N, Mabbs R. The influence of molecular symmetry and topological factors on the internal heavy atom effect in aromatic and heteroaromatic compounds. *Spectrochimica acta Part A, Molecular and biomolecular spectroscopy*. 2001; 57(7):1449–62. Epub 2001/07/12. PMID: [11446700](https://pubmed.ncbi.nlm.nih.gov/11446700/).
63. Bakayan A, Domingo B, Miyawaki A, Llopis J. Imaging Ca activity in mammalian cells and zebrafish with a novel red-emitting aequorin variant. *Pflugers Archiv: European journal of physiology*. 2014. doi: [10.1007/s00424-014-1639-3](https://doi.org/10.1007/s00424-014-1639-3) PMID: [25355614](https://pubmed.ncbi.nlm.nih.gov/25355614/).
64. Bakayan A, Vaquero CF, Picazo F, Llopis J. Red fluorescent protein-aequorin fusions as improved bioluminescent Ca<sup>2+</sup> reporters in single cells and mice. *PloS one*. 2011; 6(5):e19520. Epub 2011/05/19. doi: [10.1371/journal.pone.0019520](https://doi.org/10.1371/journal.pone.0019520) PMID: [21589654](https://pubmed.ncbi.nlm.nih.gov/21589654/); PubMed Central PMCID: PMC3092744.
